# Supplementary material
Source: PubMed Central journal article supplement (PMC6453235)
Supplement: 736202_End_of_life_Stegmayr-tables-revised_BS.pdf [file 736202_End_of_life_Stegmayr-tables-revised_BS.pdf]

**Table 1.** Characteristics of all included deceased stroke patients who died within one year after an index stroke and of the subpopulations with and without data on end of life care. P values indicate chi-square testing of differences between all deceased patients vs. patients with data available at the end of life, excluding patients with missing information.

| Patient characteristics                               | All deceased<br>(n=42 502) | Data on end of life care<br>(n=16 408) | No data on end of life<br>care (n=26 094) | p value |
|-------------------------------------------------------|----------------------------|----------------------------------------|-------------------------------------------|---------|
| Sex                                                   |                            |                                        |                                           |         |
| Male                                                  | 18 803 (44%)               | 7075 (43%)                             | 11 728 (45%)                              | <0.001  |
| Female                                                | 23 699 (56%)               | 9333 (57%)                             | 14 366 (55%)                              |         |
| Mean age, years                                       |                            |                                        |                                           |         |
| At death                                              | 82.3                       | 83.1                                   | 81.8                                      | <0.001  |
| Living alone*                                         |                            |                                        |                                           |         |
| Yes                                                   | 26 637 (63%)               | 10 593 (65%)                           | 16 044 (62%)                              | <0.001  |
| No                                                    | 15 427 (36%)               | 5671 (35%)                             | 9756 (37%)                                |         |
| Information missing                                   | 438 (1%)                   | 144 (1%)                               | 294 (1%)                                  |         |
| Comorbidity*                                          |                            |                                        |                                           |         |
| Previous stroke                                       |                            |                                        |                                           |         |
| Yes                                                   | 9351 (22%)                 | 3162 (19%)                             | 6189 (24%)                                | <0.001  |
| No                                                    | 32 411 (76%)               | 13 021 (79%)                           | 19 390 (74%)                              |         |
| Information missing                                   | 740 (2%)                   | 225 (1%)                               | 515 (2%)                                  |         |
| Atrial fibrillation                                   |                            |                                        |                                           |         |
| Yes                                                   | 17 786 (42%)               | 6925 (42%)                             | 10 861 (42%)                              | 0.588   |
| No                                                    | 24 073 (57%)               | 9310 (57%)                             | 14 763 (57%)                              |         |
| Information missing                                   | 643 (2%)                   | 173 (1%)                               | 470 (2%)                                  |         |
| Diabetes                                              |                            |                                        |                                           |         |
| Yes                                                   | 9283 (22%)                 | 3597 (22%)                             | 5686 (22%)                                | 0.987   |
| No                                                    | 32 709 (77%)               | 12 671 (77%)                           | 20 038 (77%)                              |         |
| Information missing                                   | 510 (1%)                   | 140 (1%)                               | 370 (1%)                                  |         |
| Hypertension                                          |                            |                                        |                                           |         |
| Yes                                                   | 26 122 (62%)               | 10 544 (64%)                           | 15 578 (60%)                              | <0.001  |
| No                                                    | 15 486 (36%)               | 5624 (34%)                             | 9862 (38%)                                |         |
| Information missing                                   | 894 (2%)                   | 240 (2%)                               | 654 (3%)                                  |         |
| Level of consciousness on admission for index stroke* |                            |                                        |                                           |         |
| Fully conscious                                       | 23 250 (55%)               | 9675 (59%)                             | 13 575 (52%)                              | <0.001  |
| Drowsy                                                | 11 227 (26%)               | 4169 (25%)                             | 7058 (27%)                                |         |
| Unconscious                                           | 7321 (17%)                 | 2259 (14%)                             | 5062 (19%)                                |         |
| Information missing                                   | 704 (2%)                   | 305 (2%)                               | 399 (2%)                                  |         |
| Place of death**                                      |                            |                                        |                                           |         |
| In hospital                                           | 26 504 (62%)               | 9199 (56%)                             | 17 305 (66%)                              | <0.001  |
| In nursing home                                       | 11 121 (26%)               | 5543 (34%)                             | 5578 (21%)                                |         |
| At home                                               | 1617 (4%)                  | 629 (4%)                               | 988 (4%)                                  |         |
| Other, unknown                                        | 3260 (8%)                  | 1037 (6%)                              | 2223 (9%)                                 |         |

\*Recorded at index stroke in the Riksstroke register

\*\*As recorded in the Cause of Death register

\*\*\*Excluded from test

**Table 2.** Characteristics of end of life care in deceased patients during the years 2007 through 2014 who had died within a year from the index stroke and had data both in the Riksstroke register and in the Swedish Register of Palliative Care (n=16 408). Logistic regression analysis with dependent variables coded yes/no or no information and as day(s)/all other response alternatives. Adjusted for gender, age and level of consciousness on admission to hospital (as a proxy for stroke severity).

|                                                                                                      | Own home  | In hospital      | Nursing home     | Other, unknown   | All          |
|------------------------------------------------------------------------------------------------------|-----------|------------------|------------------|------------------|--------------|
| Expected death                                                                                       |           |                  |                  |                  |              |
| Yes                                                                                                  | 545 (87%) | 7791 (85%)       | 4798 (87%)       | 852 (82%)        | 13 986 (85%) |
| No                                                                                                   | 69 (11%)  | 967 (10%)        | 567 (10%)        | 129 (12%)        | 1732 (11%)   |
| No information                                                                                       | 15 (2%)   | 441 (5%)         | 178 (3%)         | 56 (5%)          | 690 (4%)     |
| Odds ratio (95% CI)                                                                                  | Ref.      | 0.77 (0.60-0.98) | 0.88 (0.69-1.13) | 0.64 (0.48-0.85) | ----         |
| Response to the question "Did the place of death comply with the request last stated by the person?" |           |                  |                  |                  |              |
| Yes                                                                                                  | 489 (78%) | 554 (6%)         | 2132 (39%)       | 251 (24%)        | 3426 (21%)   |
| No or no information                                                                                 | 140 (22%) | 8645 (94%)       | 3411 (61%)       | 786 (76%)        | 12 982 (79%) |
| Odds ratio (95% CI)                                                                                  | Ref.      | 0.02 (0.02-0.03) | 0.19 (0.16-0.23) | 0.10 (0.08-0.13) | ---          |
| Intravenous fluid or tube feeding during last day of life                                            |           |                  |                  |                  |              |
| Yes                                                                                                  | 11 (2%)   | 2415 (26%)       | 299 (5%)         | 177 (17%)        | 2902 (18%)   |
| No                                                                                                   | 414 (66%) | 4163 (45%)       | 3414 (62%)       | 543 (52%)        | 8534 (52%)   |
| No information                                                                                       | 204 (32%) | 2621 (29%)       | 1830 (33%)       | 317 (31%)        | 4972 (30%)   |
| Odds ratio (95% CI)                                                                                  | Ref.      | 21.9 (11.7-41.1) | 3.9 (2.0-7.3)    | 13.1 (6.9-25.0)  | ---          |
| Last examination before death by a physician                                                         |           |                  |                  |                  |              |
| Day(s)                                                                                               | 219 (35%) | 6550 (71%)       | 2149 (39%)       | 557 (54%)        | 9475 (58%)   |
| Week(s)                                                                                              | 156 (25%) | 49 (1%)          | 1224 (22%)       | 131 (13%)        | 1560 (10%)   |
| A month or more                                                                                      | 43 (7%)   | 7 (0%)           | 259 (5%)         | 22 (2%)          | 331 (2%)     |
| No information                                                                                       | 211 (33%) | 2593 (28%)       | 1911 (34%)       | 327 (31%)        | 5042 (30%)   |
| Odds ratio (95% CI)                                                                                  | Ref.      | 4.33 (3.64-5.15) | 1.13 (0.94-1.34) | 2.07 (1.68-2.54) | ---          |

**Table 3.** Presence of another person at the time of death, n=16 408. Multiple regression logistic analysis includes all variables listed in the table.

|                          | None<br>n (%) | Next of kin<br>(with or without<br>staff present)<br>n (%) | Staff only<br>n (%) | Information<br>missing**<br>n (%) | Multiple logistic<br>regression odds<br>ratios<br>(95% CI) |
|--------------------------|---------------|------------------------------------------------------------|---------------------|-----------------------------------|------------------------------------------------------------|
| All                      | 3315 (20)     | 8106 (49)                                                  | 4481 (27)           | 506 (3)                           |                                                            |
| Sex                      |               |                                                            |                     |                                   |                                                            |
| Men                      | 1452 (21)     | 3506 (50)                                                  | 1914 (27)           | 203 (3)                           | Ref.                                                       |
| Women                    | 1863 (20)     | 4600 (49)                                                  | 2567 (28)           | 303 (3)                           | 1.03 (0.95-1.11)                                           |
| Age at death             |               |                                                            |                     |                                   |                                                            |
| <55                      | 19 (11)       | 114 (66)                                                   | 37 (22)             | 2 (1)                             | Ref.                                                       |
| 55-64                    | 85 (16)       | 288 (55)                                                   | 128 (25)            | 19 (4)                            | 0.51 (0.34-1.02)                                           |
| 65-74                    | 360 (19)      | 1057 (55)                                                  | 457 (24)            | 59 (3)                            | 0.52 (0.32-0.87)                                           |
| 75-84                    | 983 (19)      | 2652 (51)                                                  | 1403 (27)           | 153 (3)                           | 0.53 (0.33-0.88)                                           |
| ≥85                      | 1868 (22)     | 3995 (47)                                                  | 2456 (29)           | 273 (3)                           | 0.48 (0.29-0.78)                                           |
| Living condition*        |               |                                                            |                     |                                   |                                                            |
| Married/cohabitating     | 954 (17)      | 3341 (59)                                                  | 1232 (22)           | 144 (3)                           | Ref.                                                       |
| Single                   | 2337 (22)     | 4696 (44)                                                  | 3200 (30)           | 359 (3)                           | 0.73 (0.67-0.80)                                           |
| Information<br>missing** | 24 (17)       | 69 (48)                                                    | 49 (34)             | 2 (1)                             |                                                            |

\*Recorded at the time of index stroke

\*\*Excluded from test

## Supplementary tables

Supplementary Table 1. Underlying causes of death at different times after index stroke as recorded in the routine Cause of Death Register. Percentages refer to distribution of causes within each time interval.

| Underlying causes of death                       | Time interval from index stroke |            |            |             |             |
|--------------------------------------------------|---------------------------------|------------|------------|-------------|-------------|
|                                                  | 0-7 days                        | 8-28 days  | 29-90 days | 91-365 days | Total       |
| Cerebrovascular disorders                        |                                 |            |            |             |             |
| Intracerebral hemorrhage (I61)                   | 3543 (32%)                      | 1095 (12%) | 412 (6%)   | 328 (3%)    | 5378 (14%)  |
| Ischemic (I63)                                   | 3043 (28%)                      | 3003 (32%) | 1383 (19%) | 846 (8%)    | 8275 (22%)  |
| Other, late and undetermined (I60, I62, I64-I69) | 1331 (12%)                      | 1742 (19%) | 1698 (23%) | 2190 (20%)  | 6961 (18%)  |
| Total cerebrovascular (I69-I69)                  | 7917 (72%)                      | 5840 (63%) | 3493 (47%) | 3364 (31%)  | 20614 (54%) |
| Ischemic heart disease (I20-I25)                 | 743 (7%)                        | 870 (9%)   | 1092 (15%) | 1762 (16%)  | 4609 (12%)  |
| Other circulatory (I00-I15, I70-I99)             | 1946 (17%)                      | 1663 (18%) | 1172 (16%) | 1904 (18%)  | 6685 (17%)  |
| Other diseases                                   | 372 (3%)                        | 882 (10%)  | 1691 (23%) | 3753 (35%)  | 6658 (17%)  |

Supplementary Table 2. Patients with a first-ever stroke compared to the total population (first-ever and recurrent strokes) that died within a year after index stroke. Based on 32 411 (first-ever) to 42 502 (first-ever and recurrent) deaths in the Cause of Death Register and 13 021 (first-ever) to 16 408 (first-ever plus recurrent) deaths in the Swedish Register of Palliative Care.

|                                                 | First-ever events | Total stroke population |
|-------------------------------------------------|-------------------|-------------------------|
| Sex*                                            |                   |                         |
| Men                                             | 14 023 (43%)      | 18 803 (44%)            |
| Women                                           | 18 388 (57%)      | 23 699 (59%)            |
| Age at death, years, mean**                     | 82.2              | 82.3                    |
| Place of death in the 91-365-day interval **, ‡ |                   |                         |
| In hospital                                     | 3258 (36%)        | 4193 (36%)              |
| In nursing home                                 | 4023 (45%)        | 5456 (46%)              |
| At home                                         | 838 (9%)          | 1062 (9%)               |
| Other, unknown                                  | 836 (9%)          | 1081 (9%)               |
| Unexpected death †                              | 1392 (11%)        | 1731 (11%)              |
| Presence at time of death †                     |                   |                         |
| Next of kin                                     | 6445 (51%)        | 8106 (51%)              |
| Unattended                                      | 2609 (21%)        | 3315 (21%)              |

\*Data from Riksstroke

\*\*Data from the Cause of Death Register

†Data from SRPC

‡Based on 8955 deaths in this time interval
